# Supplementary material
Source: PubMed Central journal article supplement (PMC2775107)
Supplement: msp183_1.pdf [file msp183_1.pdf]

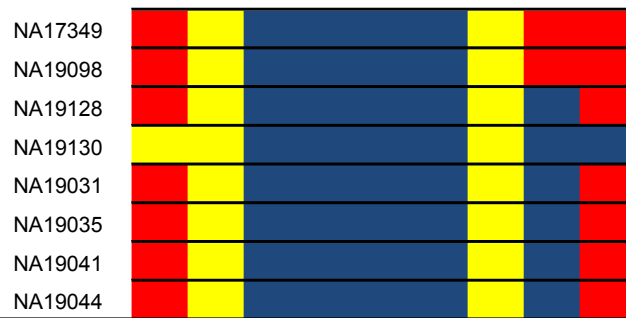

**Supplementary Figure 1.** Coriell DNA sample identifiers, along with the place of origin of the DNA samples, are shown at left. At right are genotype data from resequencing of the coding region of *GYPC*. Variable sites are listed by their dbSNP identifier or position in build hg18 of the human genome sequence for sites not in the dbSNP database. All sites fall within non-coding regions of the gene except for the position marked with a single asterisk (which indicates a synonymous variant) and the position marked with a double asterisk (which indicates a non-synonymous variant). Blue boxes indicate homozygosity for the ancestral allele (inferred from comparison with *P. troglodytes*), yellow indicates homozygosity for the derived allele, and red indicates heterozygotes.
