# Supplementary material
Source: PubMed Central journal article supplement (PMC2775107)
Supplement: msp183_2.pdf [file msp183_2.pdf]

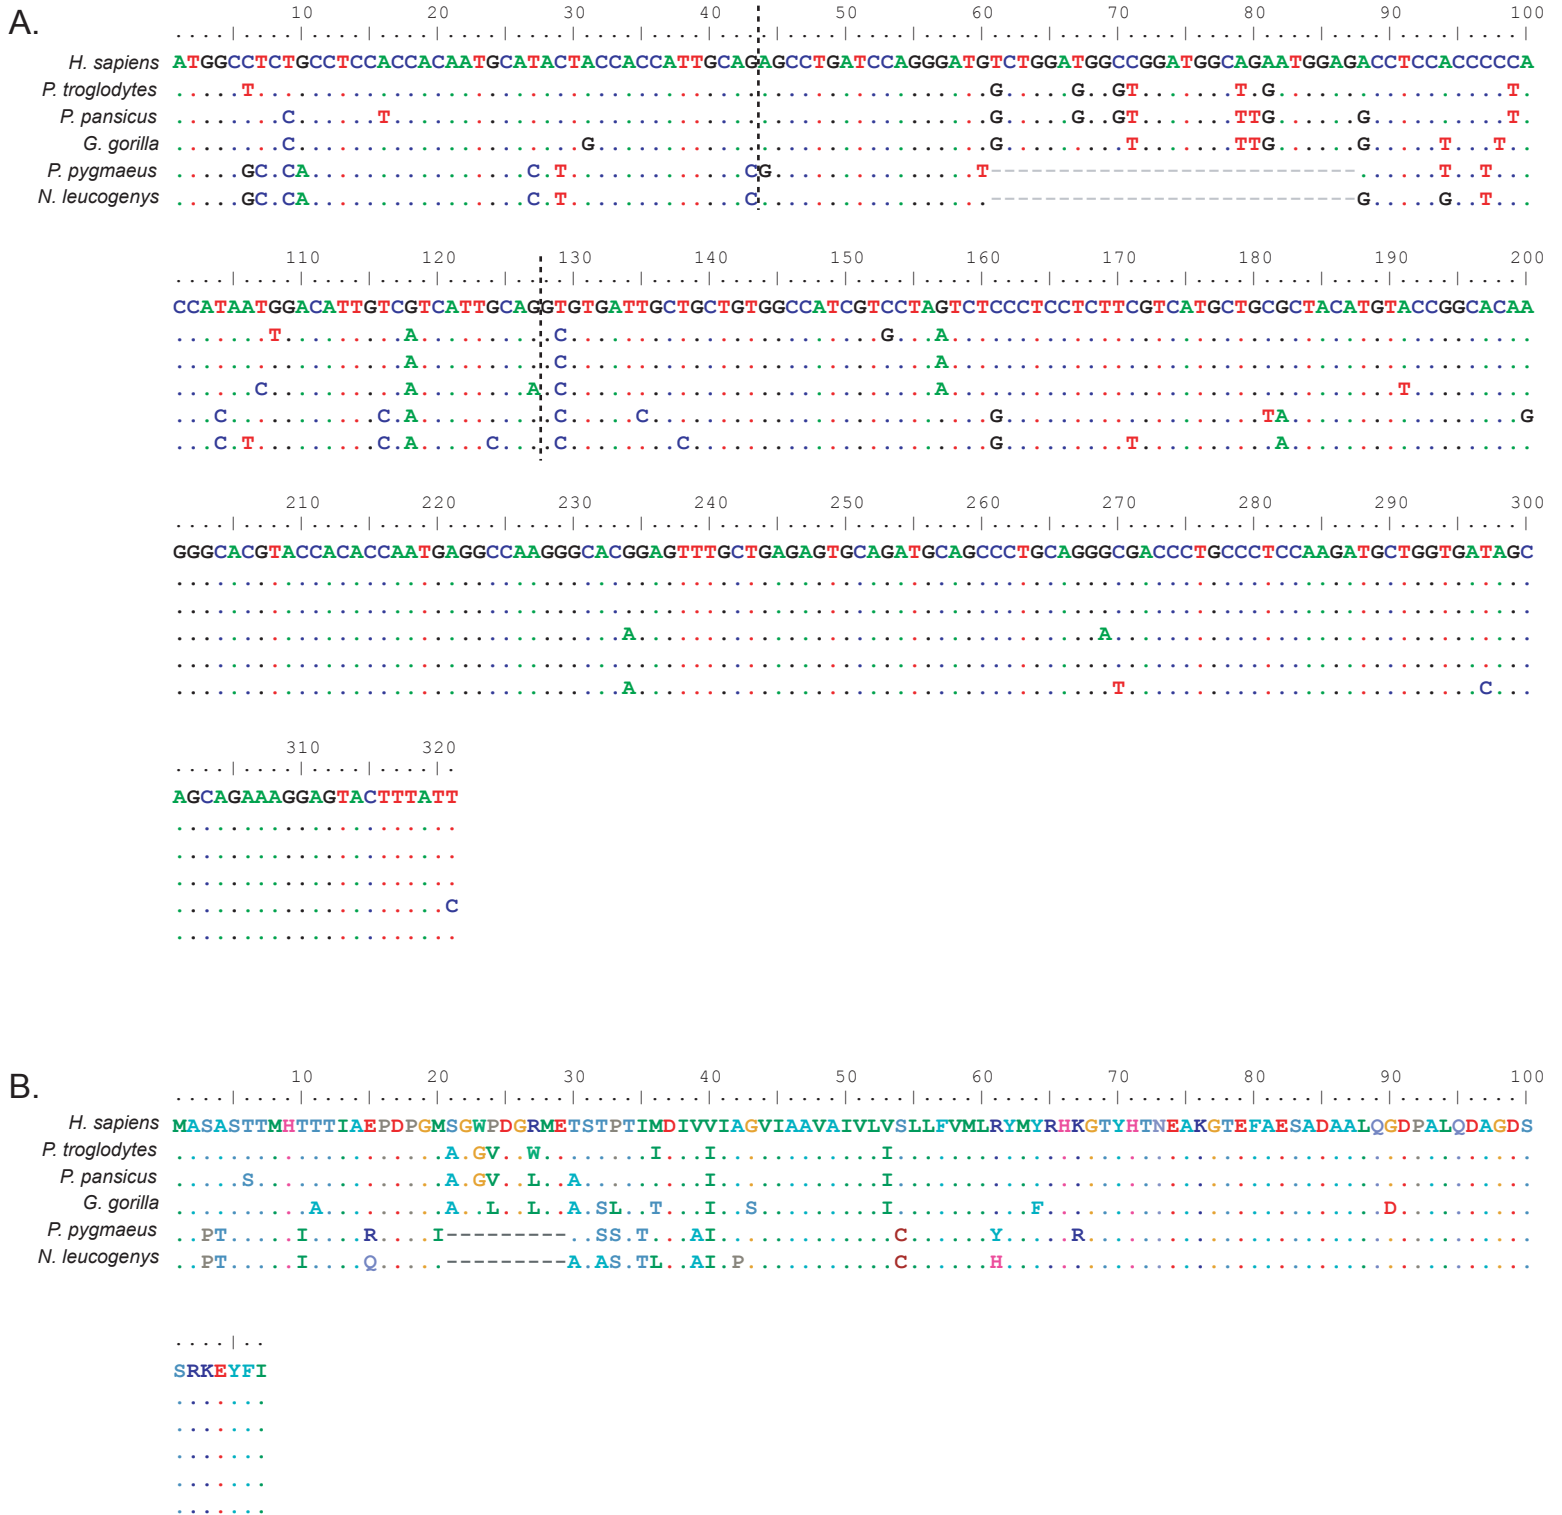

**Supplementary Figure 2.** Multispecies alignment of shared coding region of *GYPC* (corresponding to the region encoding human Glycophorin D). Panel A shows nucleotide data, and Panel B translated amino acid sequence. Dashed vertical lines show the boundaries between exons 2, 3, and 4.
